# Supplementary material for: Individualized 3D-Printed Bone-Anchored Maxillary Protraction Device for Growth Modification in Skeletal Class III Malocclusion
Source: MDPI journal article supplement (doi:10.3390/jpm11111087), 2021-10-26
Supplement: s1 [file s1]

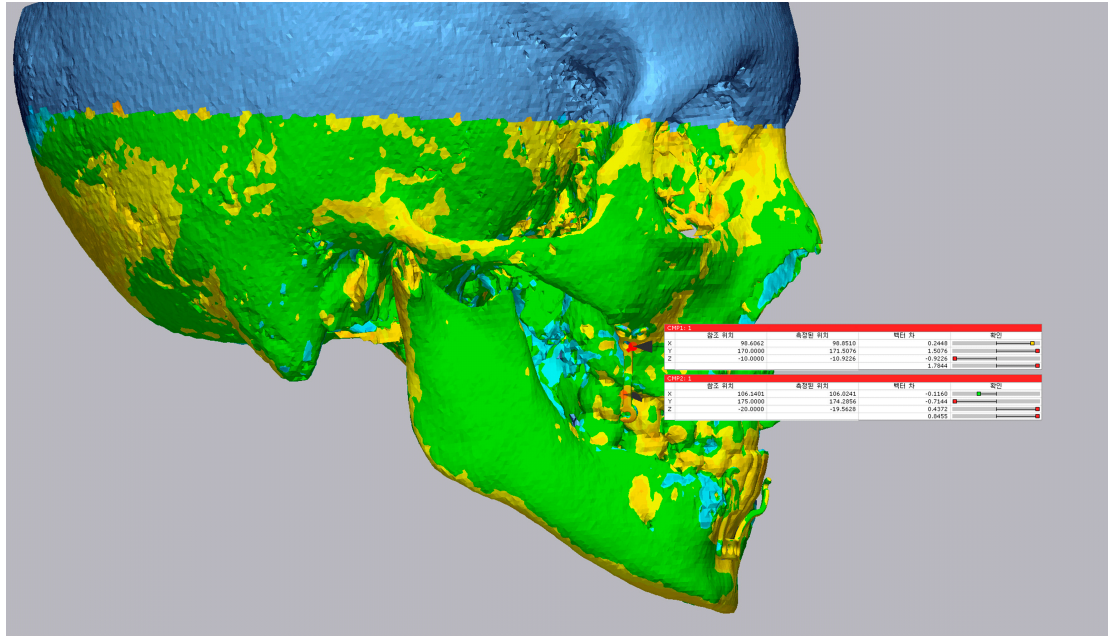

**Figure S1.** Distance measurement of 20 selected reference points.

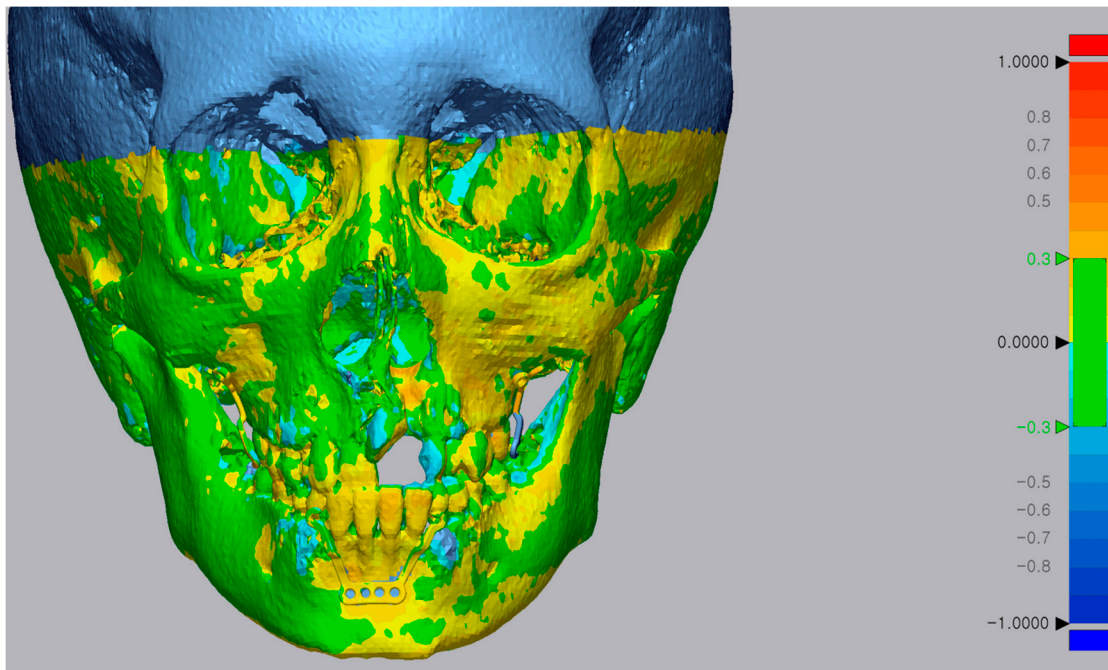

**Figure S2.** A color-coded deviation figure that visualizes the high or low geometrical deviation.
